# Supplementary material for: The ERβ5 splice variant increases oestrogen responsiveness of ERαpos Ishikawa cells
Source: PubMed Central journal article supplement (PMC6933808; doi:10.1530/erc-19-0291), 2019-11-27

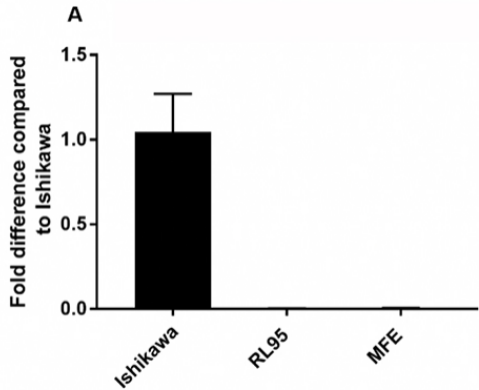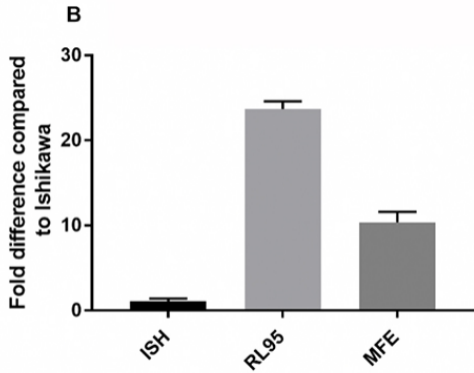

Supplement: supplementary_figure_2.pdf [file supplementary_figure_2.pdf]
