# Supplementary material for: The ERβ5 splice variant increases oestrogen responsiveness of ERαpos Ishikawa cells
Source: PubMed Central journal article supplement (PMC6933808; doi:10.1530/erc-19-0291), 2019-11-27

A

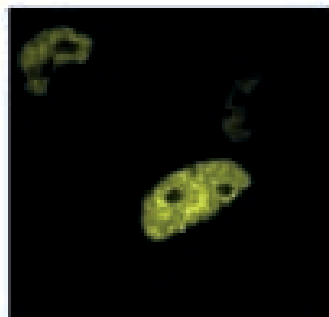

B

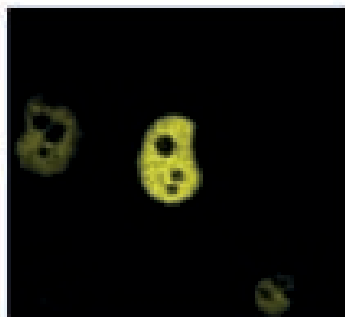

C

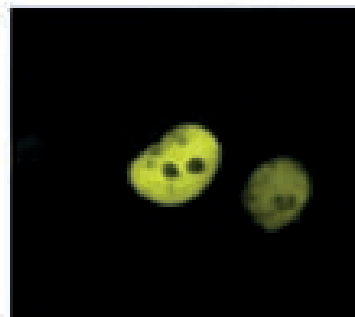

D

### Mobility of ERα-YFP

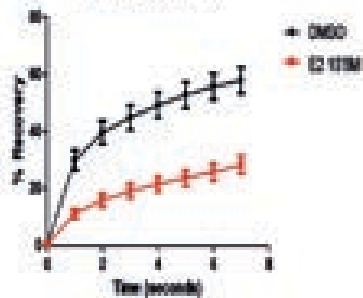

E

### MDA cells overexpressing ERβ5-YFP

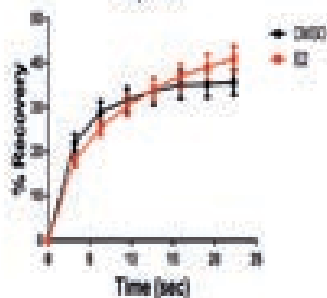

F

### MDA cells overexpressing ERα and ERβ5-YFP

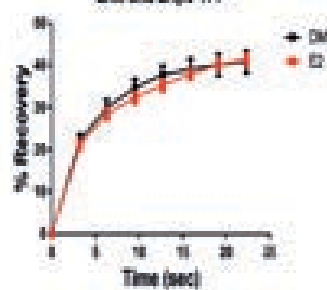

Supplement: supplementary_figure_5.pdf [file supplementary_figure_5.pdf]
