# Supplementary material for: The ERβ5 splice variant increases oestrogen responsiveness of ERαpos Ishikawa cells
Source: PubMed Central journal article supplement (PMC6933808; doi:10.1530/erc-19-0291), 2019-11-27
Supplement: supplementary_table_2.pdf [file supplementary_table_2.pdf]

Information on Antibodies

| Antibody Name | Supplier/Cat number                                         | Target                                                                                         | Species raised, monoclonal/polyclonal | Positive controls         | Dilution used following titre optimisation | Comparison with mRNA levels |
|---------------|-------------------------------------------------------------|------------------------------------------------------------------------------------------------|---------------------------------------|---------------------------|--------------------------------------------|-----------------------------|
| ER $\alpha$   | Vector/VP-E614<br><br>Clone:ER6F11<br><br>Lot number N/A    | Recombinant protein of the full length alpha form of the human estrogen receptor molecule.     | Mouse monoclonal                      | Proliferative endometrium | 1:80                                       | √                           |
| ER $\beta$ 5  | BioRad/MCA4676T<br><br>Clone: 5/25<br><br>Lot number:080110 | Tuberculin conjugated synthetic peptide LLSHVRHARYAP derived from the C-terminus of human ERB5 | Mouse Monoclonal                      | Colorectal cancer         | 1:200                                      | √                           |
